# Supplementary material
Source: PubMed Central journal article supplement (PMC1482504)
Supplement: pnas_0601210103_3.pdf [file pnas_0601210103_3.pdf]

**Table 2. Native contact pairs**

|         |         |         |        |        |        |
|---------|---------|---------|--------|--------|--------|
| 1 – 24  | 1 – 45  |         |        |        |        |
| 2 – 18  | 2 – 20  | 2 – 24  | 2 – 25 | 2 – 26 | 2 – 43 |
| 3 – 26  | 3 – 41  | 3 – 43  |        |        |        |
| 4 – 16  | 4 – 18  | 4 – 26  | 4 – 27 | 4 – 28 | 4 – 41 |
| 5 – 28  | 5 – 39  | 5 – 41  |        |        |        |
| 6 – 16  | 6 – 28  | 6 – 29  | 6 – 30 | 6 – 39 |        |
| 7 – 30  | 7 – 37  | 7 – 39  |        |        |        |
| 8 – 14  | 8 – 30  | 8 – 31  | 8 – 32 | 8 – 37 |        |
| 9 – 32  | 9 – 37  |         |        |        |        |
| 14 – 29 | 14 – 30 | 14 – 31 |        |        |        |
| 16 – 27 | 16 – 28 | 16 – 29 |        |        |        |
| 18 – 26 | 18 – 27 |         |        |        |        |
| 20 – 24 | 20 – 25 |         |        |        |        |
| 24 – 43 | 24 – 45 |         |        |        |        |
| 26 – 41 | 26 – 43 |         |        |        |        |
| 28 – 39 | 28 – 41 |         |        |        |        |
| 30 – 39 |         |         |        |        |        |
| 32 – 37 |         |         |        |        |        |
