# Supplementary material
Source: PubMed Central journal article supplement (PMC1482504)
Supplement: pnas_0601210103_4.pdf [file pnas_0601210103_4.pdf]

**Table 3.** Average folding times and temperatures for tether points 1, 22, and 34 with longer linkers.

| Tether point | height    | $T_c$ | $T_f$ | $\tau_{ave}$<br>$T=T_f$ | $\tau_{ave}$<br>$T=0.480$ |
|--------------|-----------|-------|-------|-------------------------|---------------------------|
| 1            | $2\sigma$ | 0.591 | 0.506 | $7,786 \pm 267$         | $7,594 \pm 253$           |
| 22           | $2\sigma$ | 0.617 | 0.523 | $3,229 \pm 111$         | $3,020 \pm 114$           |
| 34           | $2\sigma$ | 0.600 | 0.583 | $5,333 \pm 207$         | $2,951 \pm 116$           |
| 1            | $5\sigma$ | 0.600 | 0.523 | $5,476 \pm 226$         | $5,021 \pm 197$           |
| 22           | $5\sigma$ | 0.608 | 0.523 | $3,100 \pm 108$         | $2,867 \pm 196$           |
| 34           | $5\sigma$ | 0.600 | 0.523 | $3,552 \pm 126$         | $3,055 \pm 112$           |

In each case, tethering with larger values of  $h_t$  shifts the behavior closer to its bulk values, though even in cases where thermodynamics are identical to the bulk, folding times can be longer. Details about time and temperature units are given in the legend of Table 1.
